# Supplementary material for: A cerebrospinal fluid microRNA signature as biomarker for glioblastoma
Source: Oncotarget. 2017 Jun 1;8(40):68769–79. doi: 10.18632/oncotarget.18332 (PMC5620295; doi:10.18632/oncotarget.18332)
Supplement: Supplementary file 1 [file oncotarget-08-68769-s001.pdf]

# A cerebrospinal fluid microRNA signature as biomarker for glioblastoma

## SUPPLEMENTARY MATERIALS

### Supplementary Methods

#### Clinical specimen collection

Fifteen pairs of matched tumor specimen and CSF were collected and used for correlation studies. These samples were collected at UMH (n=10), TUM (n=4), and UCSD (n=1). For miRNA signature development, 5 patients cohorts were collected. Cohort 1 included cisternal and lumbar CSF collected from 21 glioblastoma patients (6 from UCSD and 15 from TUM) and 15 non-oncologic controls from UCSD (trauma (n=4), subarachnoid hemorrhage (n=6), normal pressure hydrocephalus (n=3), Middle Cerebral Artery Stroke (n=1) and Intracerebral hemorrhage (n=1)). Cohort 2 included lumbar CSF collected from 40 glioblastoma patients and 27 non-oncologic controls (normal pressure hydrocephalus (n=18)) patients from Huashan Hospital in China. For Cohort 1 and Cohort 2, both EV and supernatant miRNA were profiled. Cohort 3 was comprised of 13 glioblastoma samples and 19 non-oncologic controls from UCSD (trauma (n=5), subarachnoid hemorrhage (n=8), normal pressure hydrocephalus (n=2), arteriovenous malformation (n=2), Middle Cerebral Artery Stroke (n=1) and Intracerebral hemorrhage (n=1)). Cisternal CSF was obtained from these patients, and the EV miRNA profile was determined. Cohort 4 included cisternal CSF collected from 10 glioblastoma and 12 non-oncologic patients at UCSD (trauma (n=1), subarachnoid hemorrhage (n=2), normal pressure hydrocephalus (n=4), intraparenchymal hemorrhage (n=3), intracerebral hemorrhage (n=1), and seizure (n=1)). Cohort 5 consisted of lumbar CSF collected from 18 Huashan Hospital patients and 20 healthy controls from UCSD. For Cohort 4 and Cohort 5, total RNA was isolated from crude CSF and profiled for miRNA expression.

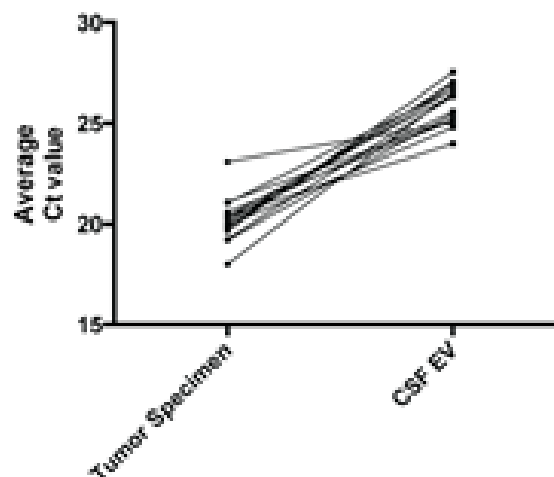

Supplementary Figure 1: Average  $C_T$  value of detectable miRNA in glioblastoma tumor specimen vs. CSF EV

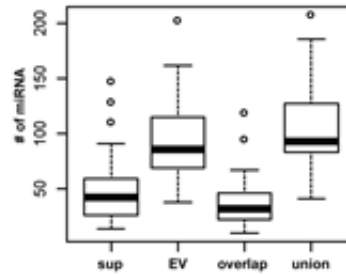

Supplementary Figure 2: Comparison of the number of miRNA species detected in the different fractions of CSF from Cohort 1.

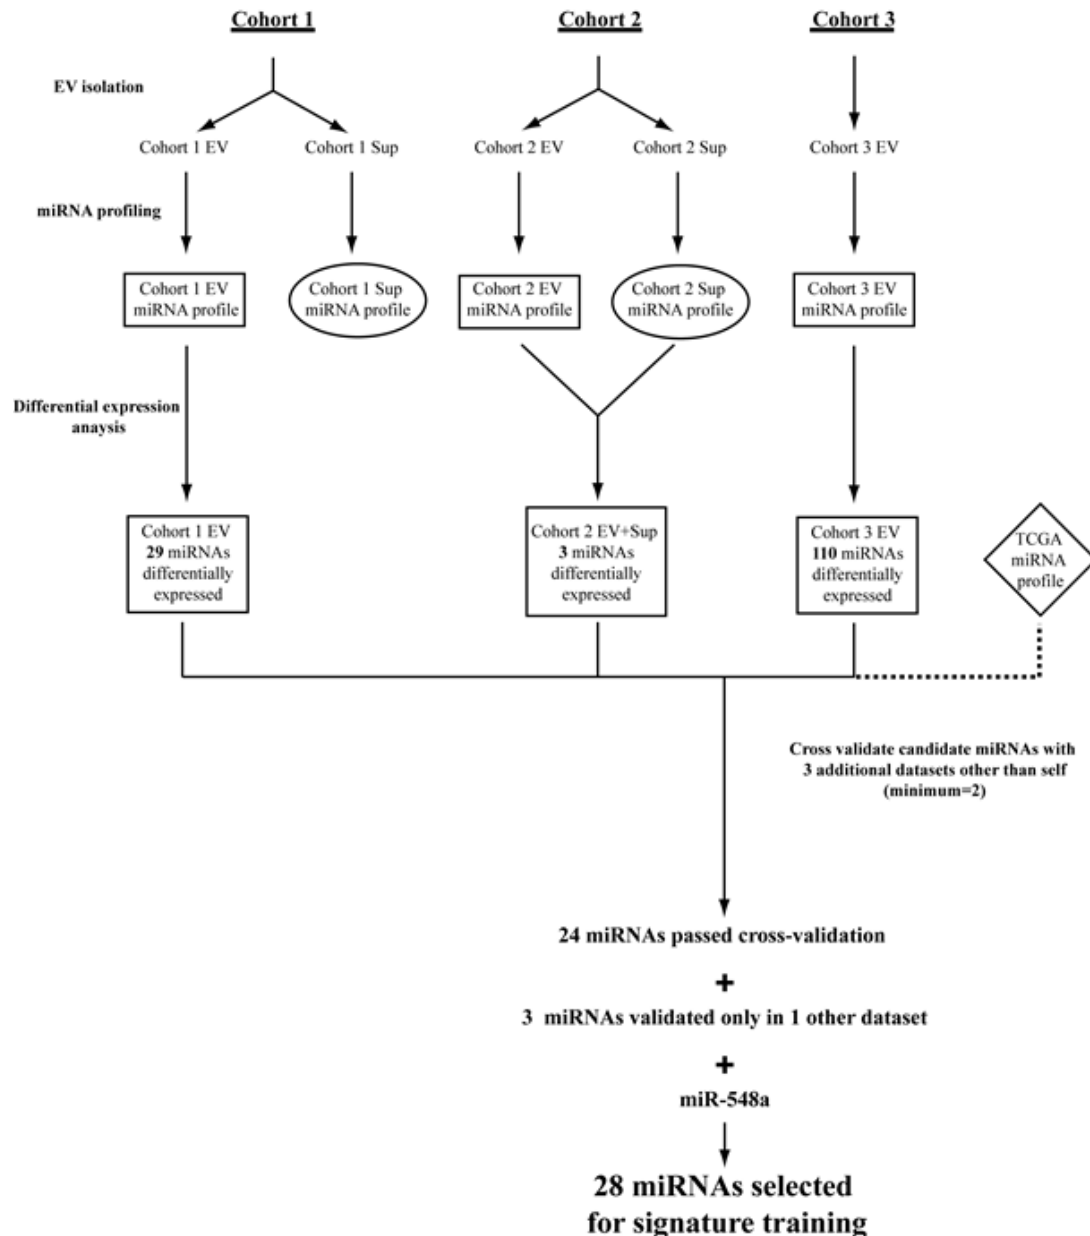

Supplementary Figure 3: miRNA profiling and candidate miRNA selection plan.

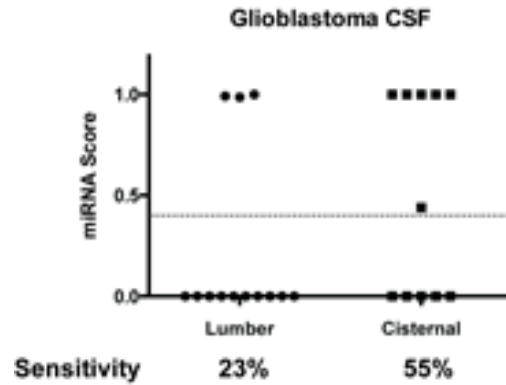

Supplementary Figure 4: Comparing the sensitivity of the 9-miRNA signature using CSF EVs isolated from lumbar and cisternal CSF (Cohort 1).

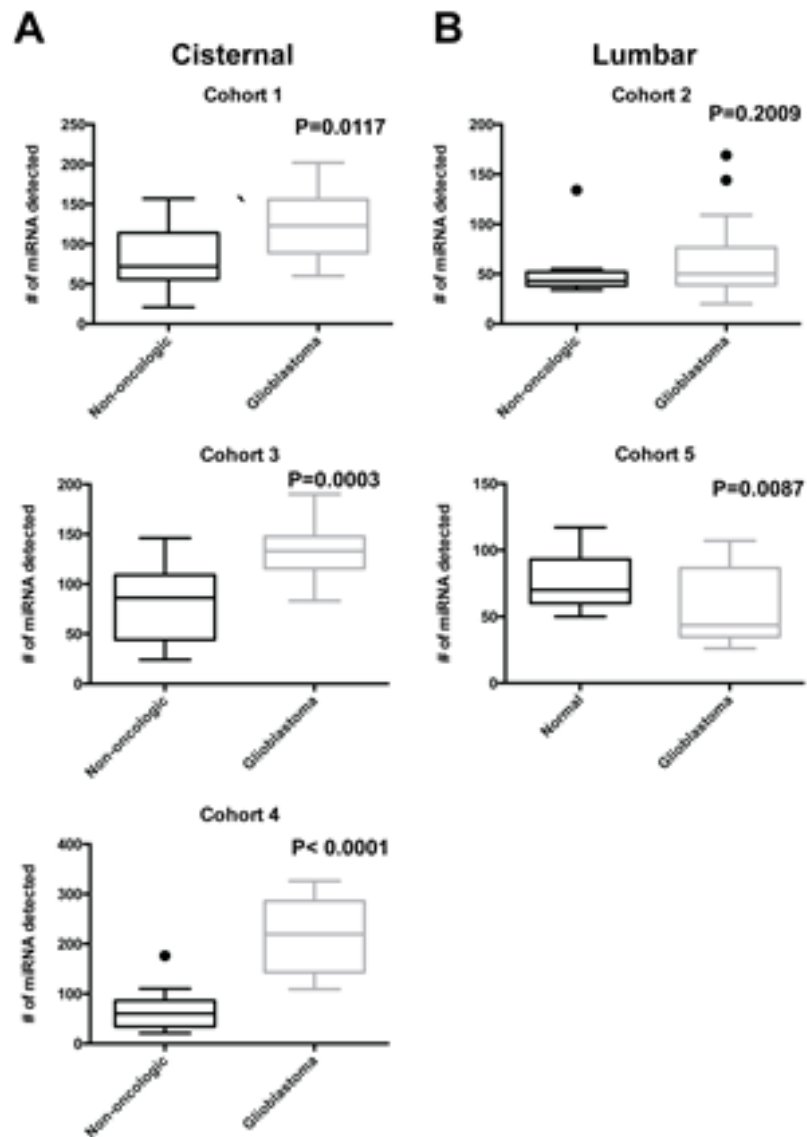

Supplementary Figure 5: Detectable number of miRNA species in (A) cisternal CSF and (B) lumbar CSF.

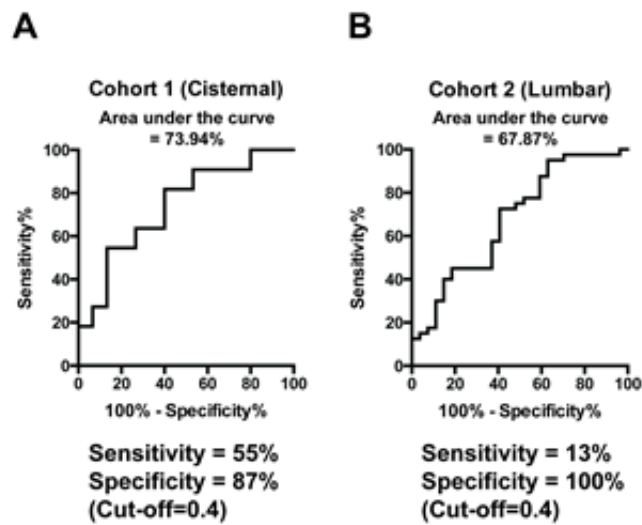

**Supplementary Figure 6: (A) Performance of the 9-miRNA signature using CSF EVs isolated from cisternal CSF: Cohort 1. (B) Performance of the 9-miRNA signature using CSF EVs isolated from lumbar CSF: Cohort 2.**
